1 **Mitochondrial mutations in *Caenorhabditis elegans* show signatures of oxidative damage**  
2 **and an AT-bias**

3

4 Gus Waneka<sup>\*,1</sup>, Joshua M. Svendsen<sup>\*</sup>, Justin C. Havird<sup>†</sup>, Daniel B. Sloan<sup>\*</sup>

5 <sup>\*</sup>Department of Biology, Colorado State University, Fort Collins, CO, USA

6 <sup>†</sup>Department of Integrative Biology, University of Texas at Austin, Austin, TX, USA

7

8 **DATA AVAILABILITY**

9 The raw reads are available via the NCBI Sequence Read Archive (SRA) under accessions

10 SRR14352240-14352248 (Duplex Sequencing libraries; Table S1) and SRR14352249,

11 SRR14352237, and SRR14352238 (shotgun libraries 1, 2 and 3, respectively).

12 **Short running title: Mutation in *C. elegans* mtDNA**

13 **List of keys words and phrases:** Mutation spectra, replication error, oxidative damage, cytosine

14 deamination, oxidized guanine, mitochondrial mutation, metazoan mtDNA, low-frequency

15 variant, Duplex Sequencing, mutation accumulation

16

17 <sup>1</sup>Author for Correspondence: Gus Waneka, Biology Department, Colorado State University, Fort

18 Collins, USA, [gus.waneka@gmail.com](mailto:gus.waneka@gmail.com)

19

20 **ABSTRACT**

21 Rapid mutation rates are typical of mitochondrial genomes (mtDNAs) in animals, but it is not  
22 clear why. The difficulty of obtaining measurements of mtDNA mutation that are not biased by  
23 natural selection has stymied efforts to distinguish between competing hypotheses about the  
24 causes of high mtDNA mutation rates. Several studies which have measured mtDNA mutations  
25 in nematodes have yielded small datasets with conflicting conclusions about the relative  
26 abundance of different substitution classes (i.e. the mutation spectrum). We therefore leveraged  
27 Duplex Sequencing, a high-fidelity DNA sequencing technique, to characterize *de novo* mtDNA  
28 mutations in *Caenorhabditis elegans*. This approach detected nearly an order of magnitude more  
29 mtDNA mutations than documented in any previous nematode mutation study. Despite an  
30 existing extreme AT bias in the *C. elegans* mtDNA (75.6% AT), we found that a significant  
31 majority of mutations increase genomic AT content. Compared to some prior studies in  
32 nematodes and other animals, the mutation spectrum reported here contains an abundance of  
33 CG→AT transversions, supporting the hypothesis that oxidative damage may be a driver of  
34 mtDNA mutations in nematodes. Further, we found an excess of G→T and C→T changes on the  
35 coding DNA strand relative to the template strand, consistent with increased exposure to  
36 oxidative damage. Analysis of the distribution of mutations across the mtDNA revealed  
37 significant variation among protein-coding genes and as well as among neighboring nucleotides.  
38 This high-resolution view of mitochondrial mutations in *C. elegans* highlights the value of this  
39 system for understanding relationships among oxidative damage, replication error, and mtDNA  
40 mutation.

## 41 INTRODUCTION

42 Mitochondrial genomes (mtDNAs) of most animals have mutation rates about one order of  
43 magnitude greater than their corresponding nuclear genomes (Wolfe *et al.* 1987; Denver *et al.*  
44 2000, 2004; Havird and Sloan 2016; Allio *et al.* 2017). While rapid mtDNA mutation rates of  
45 metazoans have proven useful for understanding the divergence of closely related species (Bernt  
46 *et al.* 2013; Yang *et al.* 2016), they also pose a serious challenge for organismal fitness  
47 (Gemmell *et al.* 2004). In humans, mtDNA mutations cause genetic disorders (Longley *et al.*  
48 2005; Marni J. and Soondhiemer 2010), are associated with numerous cancers (Gorelick *et al.*  
49 2021), and accumulate with age (Kennedy *et al.* 2013). Further, individuals suffering from age-  
50 related diseases such as Parkinson's and Alzheimer's display increased mtDNA mutations  
51 compared to healthy individuals (Monzio Compagnoni *et al.* 2020). The mechanisms underlying  
52 high mtDNA mutation rates in metazoans remain the subject of ongoing research and debate.

53 Historically, elevated mtDNA mutation rates have been hypothesized to be driven by  
54 oxidative damage (Harman 1972; Miquel *et al.* 1980; Richter *et al.* 1988; Shigenaga *et al.* 1994)  
55 from reactive oxygen species (ROS), which are abundant biproducts of electron transport in the  
56 mitochondria (Murphy 2009). Several studies measuring mtDNA mutations in metazoans have  
57 raised doubts about the oxidative damage hypothesis. Specifically, genetic backgrounds with  
58 increased ROS do not show a detectable increase in mtDNA mutations (Itsara *et al.* 2014), nor  
59 do those with deficiencies in oxidative damage repair machinery (Halsne *et al.* 2012; Itsara *et al.*  
60 2014; Kauppila *et al.* 2018). In addition, the mtDNA mutation spectra from humans is relatively  
61 deplete of CG→AT transversions (Kennedy *et al.* 2013), a substitution class considered a  
62 hallmark of oxidative damage (Cheng *et al.* 1992; Kirkwood and Kowald 2012).

63           Alternatively, high metazoan mtDNA mutation rates may be driven by replication errors  
64 or deficiencies in mtDNA repair machinery (Longley *et al.* 2005; Szczepanowska and Trifunovic  
65 2015; DeBalsi *et al.* 2017; Hood *et al.* 2019). The replication error hypothesis is supported by *in*  
66 *vitro* mtDNA replication assays with Pol  $\gamma$  (the metazoan mtDNA polymerase), which  
67 recapitulate most (83%) of the mutational hotspots detected in a portion of the human  
68 mitochondrial genome through phylogenetic methods (Zheng *et al.* 2006). The *in vivo* mtDNA  
69 mutational spectra of humans, fruit flies, and mice, are all dominated by CG $\rightarrow$ TA transitions,  
70 which are commonly attributed to Pol  $\gamma$  error (Zheng *et al.* 2006; Kennedy *et al.* 2013; Itsara *et*  
71 *al.* 2014; Melvin and Ballard 2017; Arbeithuber *et al.* 2020). However, because cytosine  
72 deamination (to uracil) is likely a major cause of CG $\rightarrow$ TA transitions in metazoan mtDNAs, the  
73 high abundance of these substitutions may reflect a complex relationship between single-  
74 stranded DNA damage, failed DNA repair, and replication error. Deamination of cytosine can  
75 occur via spontaneous hydrolysis (Nabel *et al.* 2012), but oxidative damage can also play a role  
76 by creating modified bases that are more prone to deamination and/or less accessible to repair  
77 pathways (Kreutzer and Essigmann 1998). It is not clear whether cytosine deamination in  
78 metazoan mtDNAs is driven by spontaneous hydrolysis, oxidative damage, or a combination of  
79 the two. If deaminated cytosines are not repaired through base excision repair (BER), Pol  $\gamma$   
80 frequently incorporates adenine opposite of uracil during DNA replication (Zheng *et al.* 2006).  
81 In a successive round of DNA replication, the pairing of thymine with adenine completes the  
82 double-stranded CG $\rightarrow$ TA transition (Nabel *et al.* 2012). The role of deamination in CG $\rightarrow$ TA  
83 transitions in metazoan mtDNAs is supported by strand asymmetry analyses, which have  
84 revealed significantly higher frequencies of C $\rightarrow$ T than G $\rightarrow$ A changes on mtDNA strands that  
85 spend increased time in single-stranded states during mtDNA replication (Kennedy *et al.* 2013;

86 Itsara *et al.* 2014; Ju *et al.* 2014; Arbeithuber *et al.* 2020). Such asymmetric single-stranded  
87 exposure likely explains why the C→T change occurs on the “minor strand” in 91% of CG→TA  
88 transitions in fruit fly mtDNA (Itsara *et al.* 2014). Interactions between damage and polymerase  
89 fidelity can be difficult to untangle. For example, a recent study showed the *in vitro* proofreading  
90 activity of human Pol  $\gamma$  decreased when oxidative stress was applied to the enzyme (Anderson *et*  
91 *al.* 2020).

92 A major obstacle in understanding causes of metazoan mtDNA mutations stems from the  
93 difficulty of detecting rare mutation events and removing the biasing effects of selection.  
94 Mutation accumulation (MA) experiments (Katju and Bergthorsson 2019) have been used to  
95 address this challenge in fruit flies (Haag-Liautard *et al.* 2008; Keightley *et al.* 2009), mice  
96 (Uchimura *et al.* 2015), water fleas (Xu *et al.* 2012) and most extensively, nematodes (Denver *et*  
97 *al.* 2000; Howe *et al.* 2010; Molnar *et al.* 2011; Konrad *et al.* 2017; Wagner *et al.* 2020). MA  
98 studies remove the filtering effects of natural selection by bottlenecking experimental lines  
99 through randomly selected individuals for successive generations. Under these conditions, non-  
100 lethal mutations are expected to accumulate and can be assayed through genome resequencing of  
101 the final MA generation. However, while MA experiments have proven extremely useful for  
102 studying mutation (Lynch *et al.* 2016), this approach poses special challenges for measuring  
103 mtDNA mutations (Schaack *et al.* 2020). Mitochondrial genomes remain multicopy throughout  
104 the entirety of metazoan germline development (Bratic *et al.* 2010; Wai *et al.* 2010), giving  
105 selection the opportunity to act on competing mtDNAs within an individual (Fan *et al.* 2008),  
106 even during MA experiments (Schaack *et al.* 2020). The polyploid nature of mtDNAs means that  
107 new mutations are born into a low frequency, heteroplasmic state (multiple haplotypes within the  
108 same mitochondria or individual). New mtDNA mutations must therefore rise in frequency

109 (through drift or selection; Schaack *et al.* 2020) in order to meet the detection thresholds set by  
110 the high error rates (often above  $10^{-3}$  errors per bp) of traditional DNA sequencing methods  
111 (Schirmer *et al.* 2016).

112 Two large-scale MA experiments with the nematode *Caenorhabditis elegans* have  
113 reached very different conclusions regarding the spectrum of mtDNA mutations (Denver *et al.*  
114 2000; Konrad *et al.* 2017). The pioneering study of (Denver *et al.* 2000) was the first MA  
115 experiment to characterize mtDNA mutations in metazoans, using Sanger sequencing to detect a  
116 total of 26 mutations in 74 MA lines bottlenecked for an average of 214 generations. The 16  
117 single nucleotide variants (SNVs) they identified indicated a bias towards mutations that increase  
118 GC content (10 variants increased GC content, four decreased GC content and two were GC  
119 neutral), a surprising finding given that the *C. elegans* mtDNA is 75.6% AT. However, a more  
120 recent *C. elegans* MA experiment utilized Illumina sequencing to detect a total of 24 mtDNA  
121 mutations (nine SNVs) in 20 MA lines each bottlenecked for an average of 363 generations and  
122 found a strong bias in the opposite direction; eight of nine SNVs increased AT content, and the  
123 other SNV was AT neutral (Konrad *et al.* 2017). Both of these studies were impressive, multi-  
124 year undertakings, and it is unclear whether the differences in the reported spectra are driven by  
125 biological differences in the *C. elegans* lines or rearing conditions, differences in sequencing  
126 techniques, or noise associated with small sample sizes. Additional MA experiments conducted  
127 with the nematodes *Caenorhabditis briggsae* (Howe *et al.* 2010; Wagner *et al.* 2020) and  
128 *Pristionchus pacificus* (Molnar *et al.* 2011) have also yielded very few mutations (seven to 19  
129 SNVs), making it difficult to get precise estimates of mutation parameters.

130 An alternative to MA experiments has emerged in the form of high-fidelity sequencing  
131 techniques that can detect mtDNA variants segregating in tissues at extremely low frequencies

132 (Salk *et al.* 2018; Sloan *et al.* 2018). One technique called Duplex Sequencing (Schmitt *et al.*  
133 2012; Kennedy *et al.* 2014) is particularly useful for this application as it is highly accurate with  
134 error rates as low as  $\sim 2 \times 10^{-8}$  per bp (Wu *et al.* 2020), facilitating detection of *de novo* mtDNA  
135 mutations essentially as they occur. Duplex Sequencing works by tagging both ends of library  
136 molecules with random barcodes before they are amplified and sequenced. These barcodes are  
137 then used to create families of reads corresponding to each of the original strands from a parent  
138 DNA fragment. Consensus base calling eliminates variants present only in a minority of reads  
139 within a family or only in reads originating from one of the two strands, as such variants are  
140 common artifacts of single-stranded DNA damage, PCR misincorporations, and sequencing  
141 error. Here, we employed hybridization-based mtDNA enrichment coupled with Duplex  
142 Sequencing to greatly increase the detection of *de novo* mutations and better characterize the  
143 spectrum and distribution of mutations in the *C. elegans* mitochondrial genome.

144

## 145 **MATERIALS AND METHODS**

146

### 147 **Nematode growth and DNA extraction**

148 Replicate cultures of nematodes were derived from the Bristol N2 strain of *C. elegans* and grown  
149 on nematode growth media (NGM; He 2011) plates with *E. coli* strain OP50 at 20°C. Our  
150 nematode rearing protocol (outlined in Figure S1) was designed to 1) sample a diverse tissue  
151 pool comprised of many individuals (i.e. with a diversity of rare mtDNA mutations), 2) target  
152 lineages separated from each other for multiple generations to limit the contribution of shared,  
153 heteroplasmic mtDNA variants, and 3) limit the total number of generations (to three) in order to  
154 minimize potential biases of selection. Three sibling (F0) worms were randomly chosen from our



155 lab stock of N2 nematodes to initiate experimental populations (referred to hereafter as  
156 populations 1, 2 and 3). Each population was maintained for 15 generations, with passages of ten  
157 adults at each generation, before a single adult F15 founder was randomly selected and  
158 transferred to a fresh NGM plate. Three F16 progeny were then randomly chosen from each  
159 population to initiate the nine replicates assayed in this study (referred to hereafter as replicates  
160 1a, 1b, 1c, 2a, 2b, 2c, 3a, 3b, and 3c). Each replicate culture was allowed to proliferate for three  
161 generations (14 to 16 days) before all offspring in a replicate (mixed-stage individuals) were  
162 pooled for DNA extraction.

163         The three replicates from each population were grown in parallel, and the different  
164 populations were grown in three sequential batches. All culturing conditions and plate transfers  
165 followed the same outline (Figure S1). The replicates were checked daily to monitor growth and  
166 food supply. After each generation, worms were collected in M9 liquid buffer (He 2011),  
167 pelleted by centrifugation at 1,900 rcf for 30 sec, and redistributed onto fresh NGM plates. The  
168 first replating took place 7 to 9 days after the F16 replicate founder was plated. The F17 progeny  
169 were collected and redistributed onto 3 new plates. During this replating, one-third of the worms  
170 (by volume of the pellet) were discarded so as not to overwhelm the food supply on the new  
171 plates. 3 to 6 days later, the F18 worms were collected from the 3 plates (per each replicate) and  
172 pooled before half of the worms were discarded (again, so as not to overwhelm the food supply  
173 on the new plates), and the other half were redistributed onto 10 new NGM plates (per each  
174 replicate) for the final stage of growth. After 2 to 3 days, the F19 worms were collected from all  
175 10 plates (per each replicate) and pooled into one 15 mL falcon tube (per each replicate). The  
176 worms were pelleted by centrifugation at 1,900 rcf for 30 sec, and the supernatant was discarded.  
177 Then, M9 buffer was used to resuspend the worms, and the wash process was repeated 2 more

178 times to deplete contaminating *E. coli*. Total-cellular DNA was extracted from the worm pellet  
179 using the DNeasy Blood and Tissue Kit (Qiagen), following manufacturer's instructions.

180

### 181 **Duplex library preparation and mtDNA enrichment**

182 Total cellular DNA was stored at -20°C until all 9 replicates were processed. Then, Duplex  
183 Sequencing libraries were created for all 9 samples, following our previously described protocols  
184 (Wu *et al.* 2020) with some modifications. Briefly, DNA was fragmented with a Covaris M220  
185 Focused-Ultrasonicator, end repaired (NEBNext End Repair Module), and A-tailed (Klenow  
186 Fragment Enzyme, 1mM dATP). The A-tailed DNA was then adaptor ligated with custom  
187 Duplex adaptors, which contain the 12-bp random barcodes necessary for double-stranded  
188 consensus building. The adaptor-ligated product was treated with a cocktail of three repair  
189 enzymes (Uracil-DNA Glycosylase, Fpg, and Endonuclease III in NEB CutSmart Buffer) to  
190 remove fragments with single-stranded damage and 16 ng of repaired DNA was used as input for  
191 the first round of PCR (13 cycles), in which Illumina adaptors with multiplexing indices were  
192 incorporated into the amplicons (NEBNext Ultra II Q5 Master Mix, custom IDT Ultramer  
193 primers).

194 Then, 336 ng of each amplified library was processed with the Arbor Biosciences  
195 myBaits Mito kit, following manufacturer's instructions (manual version 4.01) and using their  
196 biotinylated bait panel specifically designed against the *C. elegans* mitochondrial genome. The  
197 enriched product was then PCR amplified for 11 additional cycles using universal p5 and p7  
198 primers that anneal upstream of the multiplexing indices (NEBNext Ultra II Q5 Master Mix).  
199 Amplified libraries were separated and imaged on an Agilent TapeStation 2200 (High Sensitivity

200 D1000 reagents) for quality control, and 80 nmol of each library was pooled for sequencing. The  
201 pooled library molecules had an average length of 369 bps.

202

### 203 **Total-cellular shotgun libraries to control for NUMT derived mapping artifacts**

204 Rare variant detection in mitochondrial genomes is complicated by the fact that mitochondrial  
205 sequences can occasionally be transferred to the nuclear genome (Richly and Leister 2004).  
206 These mitochondrial derived nuclear genome sequences (referred to as NUMTs) accumulate  
207 point mutations as they are largely non-functional. NUMT-derived library fragments can map to  
208 the mitochondrial genome, and variants that have accumulated in NUMTs can be difficult to  
209 distinguish from true mitochondrial mutations (Hazkani-Covo *et al.* 2010). To overcome this  
210 challenge, we have previously implemented a *k*-mer count-based approach (Wu *et al.* 2020; Broz  
211 *et al.* 2021; Waneka *et al.* 2021), where counts of each putative mtDNA mutation are tabulated  
212 from a total-cellular shotgun DNA library. NUMT-derived variants are expected to have *k*-mer  
213 counts in the shotgun library that are similar to the counts for rest of the nuclear genome. In  
214 contrast, true mtDNA mutations are expected to have *k*-mer counts substantially lower (typically  
215 0, barring sequencing errors and/or rare convergent mutations in the shotgun library) than the  
216 rest of the nuclear genome. We generated three replicate shotgun libraries for this purpose from  
217 total-cellular *C. elegans* DNA, following the same design used to generate the Duplex  
218 Sequencing replicates (Figure S1). Three sibling nematodes were used to initiate lineages that  
219 were propagated for three generations before nematodes from several plates (per replicate) were  
220 pooled for DNA extraction. To limit the potential contribution of shared, heteroplasmic variants  
221 in our nine replicates and the shotgun samples, the parent of the three replicates was selected  
222 from a lineage of N2 nematodes divergent from the nine replicates we assay for mtDNA

223 mutations. DNA was extracted using the Qiagen DNA Blood and Tissue Kit following  
224 manufacturer's instructions, and shotgun libraries were created using the NEBNext Ultra II FS  
225 DNA Library Prep Kit, with 50 ng of input DNA, a 15-minute fragmentation step, and 5 cycles  
226 of PCR amplification. Assessment of the shotgun libraries on the Agilent TapeStation 2200  
227 (High Sensitivity D1000 reagents) revealed adaptor dimers, which were subsequently removed  
228 with size selection on a 2% BluePippin gel (Sage Science) using a target range of 300-700 bp.  
229 The resultant pooled sample had an average fragment length of 392 bp.

230

### 231 **Sequencing of shotgun and Duplex Sequencing libraries, variant detection and analysis**

232 Total-cellular shotgun libraries were sequenced on an Illumina NovaSeq 6000 platform (2×150  
233 bp reads) at the University of Colorado Cancer Center, resulting in 18.1 to 22.2 M read pairs per  
234 library, equating to roughly 60× coverage of the *C. elegans* nuclear genome. The Duplex  
235 Sequencing libraries were sequenced on an Illumina HiSeq4000 platform (2×150 bp reads) by  
236 Novogene in two runs, resulting in a total of 66.8 to 76.9 M read pairs per library.

237 Duplex Sequencing reads were processed with our previously described pipeline  
238 (<https://github.com/dbsloan/duplexseq>; Wu *et al.* 2020), which 1) trims adaptor sequences  
239 (cutadapt v1.16; Martin 2011), 2) calls duplex consensus sequences (DCSs) based on shared  
240 random barcodes (each DCS required a minimum of six raw Illumina reads – at least three from  
241 each strand), 3) filters out discordant DCSs with ambiguous bases resulting from disagreement  
242 between strands, 4) aligns concordant DCSs to the reference genome (NCBI reference sequence  
243 NC\_001328.1; bowtie2 v2.3.5; Langmead and Salzberg 2012), 5) calls variants and DCS  
244 coverage by parsing the DCS alignment and 6) filters NUMTS through a comparison to a *k*-mer

245 database generated from the shotgun libraries (KMC v 3.0.0; [https://github.com/refresh-](https://github.com/refresh-bio/KMC)  
246 [bio/KMC](https://github.com/refresh-bio/KMC)). An expected AT equilibrium was calculated as:

$$247 \frac{\text{Frequency(AT decreasing subs)}}{\text{Freq(AT decreasing subs) + Freq(AT increasing subs)}}$$

248 To account for the nested structure of our data (i.e. replicates a, b, and c are nested within each  
249 population 1, 2, and 3), we implemented mixed linear models in R (ver 1.3.959), using the lme4  
250 package. In such analyses, the genomic comparison of interest (for example substitution class or  
251 genome region) was set as a fixed effect, and replicate was set as a random effect nested within  
252 population, which was also set as a random effect.

253

## 254 **RESULTS AND DISCUSSION**

255

### 256 **Targeted Duplex Sequencing provides a high-resolution view of mutation in the *C. elegans*** 257 **mitochondrial genome**

258 We enriched for mtDNA derived sequences through hybrid capture, which was highly effective,  
259 as 99.91% of all DCSs mapped to the *C. elegans* mitochondrial genome (each DCS is a  
260 consensus sequence produced from at least 6 concordant Illumina reads). In contrast, in a  
261 preliminary trial with Duplex Sequencing libraries made from total cellular *C. elegans* DNA  
262 (SRR14352239), less than 0.5% of DCSs mapped to the mitochondrial genome. For each of the  
263 nine replicates assayed, the average DCS coverage of the mitochondrial genome was 13,257×,  
264 with a range from 9,099× in replicate 1b to 15,451× in replicate 1a (Table S1).

265 We identified a total of 456 DCSs with single nucleotide variants (SNVs) and 17,582  
266 DCSs with indels (SNVs: File S1, indels: File S2). These counts do not include one variant  
267 identified as a NUMT artifact based on *k*-mer counts in total-cellular shotgun libraries. The

268 putative NUMT was present at a low frequency in every replicate and mapped to the only  
269 NUMT to have been previously identified in the *C. elegans* nuclear genome (Frith 2011). The  
270 above counts were tabulated after correcting three positions with fixed or nearly fixed  
271 differences in the nine replicates (Table S2), which presumably represent existing differences in  
272 our lab N2 line compared to the published N2 mitochondrial genome (NC\_001328.1). Raw DCS  
273 counts are inflated however by several variants present at high enough frequency to be detected  
274 in numerous DCSs. For example, a CG→TA mutation at position 5079 was present at a  
275 frequency of 0.004 in replicate 1c (158 DCSs). Similarly, a 1-bp A insertion at position 3235 was  
276 present at a frequency of 0.52 to 0.65 in the population 2 replicates (>15,000 DCSs). Across all  
277 replicates, there were 234 unique sites with an SNV, 36 unique sites with an insertion, and 65  
278 unique sites with a deletion. Although most SNVs were “singletons” detected in only one DCS,  
279 we did identify 23 SNVs that were represented by multiple DCSs from the same replicate.

280         Interestingly, there were also 15 sites with SNVs shared between replicates from different  
281 populations. Mutations shared between replicates could have either arisen through two  
282 independent, convergent mutations, or the mutation could have occurred just once in the  
283 common ancestor of both replicates and remained heteroplasmic in both replicates. Given that  
284 the majority of these SNVs are shared across populations separated for 15 generations before  
285 replicate subdivision (File S1; Figure S1), we posit that most shared SNVs arose through  
286 independent mutations. This conclusion is further supported by the observation that no SNVs  
287 were exclusively shared among replicates from the same population (File S1). Therefore, for all  
288 downstream analyses we interpreted shared variants as independent counts, resulting in 253  
289 SNVs, 108 insertions, and 84 deletions (SNVs: File S1, indels: File S2). The 253 SNVs include  
290 six sites which were tri-allelic. In all six cases, a CG reference base pair experienced both a

291 CG→TA transition and a CG→AT transversion. Three of these six sites were tri-allelic within a  
292 single replicate. We observed only a single dinucleotide substitution: an AA→GG change at  
293 position 5010 in replicate 1c. The count of 445 total mutations (253 SNVs plus 192 indels)  
294 observed here is 9-fold higher than the highest count (51 mutations; Howe *et al.* 2010) detected  
295 in any nematode MA experiment to date (Denver *et al.* 2000; Molnar *et al.* 2011; Konrad *et al.*  
296 2017; Wagner *et al.* 2020). Although this bulked sequencing approach of whole nematode  
297 populations is not conducive to estimating an absolute mutation rate per generation, the large  
298 number of detected variants makes it a powerful one for characterizing the spectrum and  
299 distribution of mutations.

300

301 **Low-frequency variants detected in *C. elegans* mtDNA indicate a strong bias towards**  
302 **mutations that increase AT content**

303 We found significant variation in the (log transformed) SNV frequency between the six  
304 substitution classes (one-way ANOVA,  $p \ll 0.0001$ ; Figure 1a). CG→TA transition and  
305 CG→AT transversion frequencies were similar to one another ( $2.09 \times 10^{-7}$  and  $1.81 \times 10^{-7}$ ,  
306 respectively), and 3- to 16-fold higher than the frequencies in the other substitution classes.  
307 Previous MA experiments to analyze nematode mtDNA mutation spectra have also reported a  
308 dominance of CG→TA transitions (Howe *et al.* 2010; Konrad *et al.* 2017), but only one *C.*  
309 *briggsae* study (with a count of 10 total SNVs), reported CG→AT transversions at a similar  
310 relative abundance to CG→TA transitions (Wagner *et al.* 2020).

311 We asked if the *C. elegans* mtDNA is at AT equilibrium, in which case the number of  
312 AT-decreasing mutations would equal the number of AT-increasing mutations. Given the  
313 dominance of CG→TA transitions and CG→AT transversions in the spectrum (Figure 1a), it

314 was not surprising that the AT-increasing count of 173 was significantly greater than the AT-  
315 decreasing count of 52 (binomial test,  $p \ll 0.0001$ ). This difference is not driven by differences  
316 in AT vs. GC sequencing coverage, as the coverage-adjusted AT-decreasing count (normalized  
317 by the ratio of AT coverage per base pair over GC coverage per base pair, as in Waneka *et al.*  
318 2021) of 61 was still significantly less than the adjusted AT-increasing count of 164 (binomial  
319 test,  $p \ll 0.0001$ ). We used the coverage-adjusted counts to determine an expected AT  
320 equilibrium of 89.4% (formula in Methods). This expected value is substantially larger than the  
321 actual mtDNA AT content (75.6%), slightly greater than the AT content at 4-fold degenerate  
322 sites (86.4%) and slightly less than AT content of the two intergenic regions of the *C. elegans*  
323 mtDNA (90.8% AT). These results suggest that AT mutation bias would push the *C. elegans*  
324 mtDNA to even more extreme AT contents if not for the stabilizing effects of natural selection,  
325 thus supporting the findings of Konrad *et al.* (2017) which ran contrary to the earlier report of a  
326 mutational bias towards GC in *C. elegans* mtDNA (Denver *et al.* 2000).

327

### 328 **Asymmetries between forward and reverse mtDNA strands suggest differences in single-** 329 **stranded damage**

330 Several biological processes, including replication (Kennedy *et al.* 2013) and transcription (Liu  
331 and Zhang 2020), can lead to systematic differences in the amount of DNA damage experienced  
332 by the two DNA strands. By definition, mutations affect both strands of DNA, but single-  
333 stranded asymmetries can be studied by comparing the frequency of reciprocal single-stranded  
334 changes for each substitution class (for example C→T vs. G→A changes) on a given DNA  
335 strand. The coding sequence for all of *C. elegans* mtDNA genes (12 protein coding genes, the  
336 two rRNA genes, and the 22 tRNA genes) are oriented in the same direction on one DNA strand



337 (hereafter F-strand for forward strand) (Okimoto *et al.* 1992). To search for signatures of DNA  
338 damage in our Duplex Sequencing data, we performed a strand asymmetry test for each of the  
339 six substitution classes. This analysis revealed significant asymmetries in both CG→TA  
340 transitions and CG→AT transversions (one-way ANOVAs,  $p = 0.0026$  and  $0.0108$ ,  
341 respectively), with disproportionate amounts of C→T and G→T changes occurring on the F-  
342 strand (Figure 1b).

343

#### 344 **The role of oxidative damage in the *C. elegans* mtDNA mutation spectrum and strand** 345 **asymmetries**

346 CG→AT transversions are indicative of oxidative damage because oxidized guanines (e.g. 8-  
347 oxo-G) are often mis-paired with adenine, causing G→T changes (Kennedy *et al.* 2013; Kino *et*  
348 *al.* 2017). The relative abundance of CG→AT transversions in the *C. elegans* mtDNA Duplex  
349 Sequencing spectrum (Figure 1a) compared to mtDNA mutation spectra produced through high-  
350 fidelity sequencing in other metazoans (Kennedy *et al.* 2013; Itsara *et al.* 2014; Ni *et al.* 2015;  
351 Samstag *et al.* 2018; Arbeithuber *et al.* 2020) suggests that oxidative damage may be particularly  
352 important for driving mtDNA mutation in nematodes. The 2.3-fold enrichment of G→T changes  
353 on the F-strand (Figure 1b) provides evidence that the abundance of CG→AT transversions  
354 observed here is not artifactual and suggests the F-strand suffers increased loads of oxidative  
355 damage *in vivo*. The other common substitution class in our data, CG→TA transitions, are likely  
356 also driven by strand-specific damage (cytosine deamination), given the 2.1-fold enrichment of  
357 C→T changes on the F-strand. Cytosine deamination can be related to oxidative damage, but it  
358 can also occur spontaneously via hydrolysis in the absence of oxidative damage (Kreutzer and  
359 Essigmann 1998; Nabel *et al.* 2012).

360 Previous high-fidelity sequencing studies observing C→T vs. G→A strand asymmetries  
361 in mtDNAs of fruit flies (Itsara *et al.* 2014), mice (Arbeithuber *et al.* 2020) and humans  
362 (Kennedy *et al.* 2013) have hypothesized that increased spontaneous deamination of cytosine on  
363 the F-strand (referred to as the H-strand or minor-strand in those systems) occurs due to  
364 increased single-stranded exposure during mtDNA replication (Falkenberg 2018). *C. elegans*  
365 mtDNA replication is distinct from the theta-type mtDNA replication that has been heavily  
366 characterized in vertebrates (Yasukawa *et al.* 2006; Cluett *et al.* 2018; Falkenberg 2018) and has  
367 also been documented in fruit flies (Jöers and Jacobs 2013). In *C. elegans*, mtDNAs are  
368 replicated through a rolling circle mechanism which produces double-stranded concatemers up to  
369 48.2 kb in length (3.5× the length of a single mtDNA; Lewis *et al.* 2015). In characterizing the  
370 rolling circle mechanism of mtDNA replication utilized by *C. elegans*, Lewis *et al.* (2015) found  
371 some evidence of single-stranded DNA through transmission electron microscopy but noted that  
372 “replication intermediates lack the extensive single-stranded DNA character expected” from  
373 theta-type mtDNA replication. Interestingly, the magnitude of asymmetries observed here (2.3-  
374 fold for G→T changes and 2.1-fold for C→T changes on the F-strand) are substantially lower  
375 than the C→T enrichment on equivalent strands in aged mice (7.9- to 11.9-fold depending on the  
376 tissue-type; Arbeithuber *et al.* 2020), humans (Kennedy *et al.* 2013), and fruit flies (Itsara *et al.*  
377 2014). In the latter two studies, the magnitudes of strand asymmetries were not reported  
378 explicitly but were >10-fold based on study data. We posit that the reduced magnitude of strand  
379 asymmetries in *C. elegans* may be associated with the lack of single-stranded intermediates  
380 reported by Lewis *et al.* (2015). Transcription may also drive mutational asymmetries observed  
381 here, as the coding (or sense) strand may be exposed while RNA polymerases bind and read off  
382 of the template strand (Liu and Zhang 2020). Because the template sequences for all *C. elegans*

383 mtDNA genes are located on the same strand, it is unclear if the F-strand suffers increased  
384 single-stranded exposure due to replication, transcription or both.

385 Interestingly, rolling circle replication can apparently be induced in mtDNAs of human  
386 cells through treatment with H<sub>2</sub>O<sub>2</sub> (a ROS; Ling *et al.* 2016; Ling and Yoshida 2020), indirectly  
387 supporting the link between rolling circle replication and oxidative stress in *C. elegans* mtDNAs.  
388 Assays with human Pol  $\gamma$  *in vitro* reveal the polymerase is particularly prone to  
389 misincorporations leading to AT→GC and CG→TA transitions (Longley *et al.* 2001; Zheng *et*  
390 *al.* 2006). Misincorporations by the nematode Pol  $\gamma$  have not been characterized, so it is possible  
391 that the relative abundance of CG→AT transversions in the Duplex Sequencing spectrum could  
392 reflect distinct replication errors of the *C. elegans* Pol  $\gamma$ . However, such polymerase error would  
393 be unable to explain the G→T vs. C→A strand asymmetries that we observed (Figure 1b).

394 In metazoan mtDNAs, BER of oxidized guanines is hypothesized to be mediated by  
395 mitochondrially targeted glycosylases OGG1 and/or MUTYH. However, *ogg1* mutant flies  
396 (Itsara *et al.* 2014) and *ogg1/mutyh* double mutant mice (Kauppila *et al.* 2018) show no increase  
397 in mtDNA mutations compared to wild-type individuals, even when mitochondria ROS levels  
398 are elevated through knockout of the mitochondrially targeted superoxide dismutase (*Sod2*) in  
399 these lines. Interestingly, *C. elegans* lines lacking mitochondrially targeted SODs experience  
400 significantly elevated mtDNA damage compared to wild-type lines, as measured with short- and  
401 long-amplicon quantitative real-time PCR (Ng *et al.* 2019). mtDNA mutations have not yet been  
402 assessed in *C. elegans sod* mutants or in lines with deficiencies in BER. While the relative  
403 abundance of CG→AT transversions in our Duplex Sequencing data supports a role of oxidative  
404 damage in driving *C. elegans* mtDNA mutations, we do not consider this evidence in support of  
405 the mitochondrial free radical theory of aging (mFRTA). The mFRTA posits that oxidative stress

406 is causal to aging (Harman 1972). While we find evidence that oxidative stress may be causal to  
407 mtDNA mutations in *C. elegans*, previous studies which have more explicitly tested the mFRTA  
408 in *C. elegans* have not found a consistent link between oxidative stress and nematode lifespan  
409 (Gruber *et al.* 2011; Ng *et al.* 2019).

410

#### 411 **Comparisons to other mtDNA mutation studies**

412 It is unlikely that the relative abundance of CG→AT transversions reported here is an artifact of  
413 Duplex Sequencing because we have recovered a diversity of unique mutation spectra with this  
414 same technique in various other biological systems (Wu *et al.* 2020; Broz *et al.* 2021; Waneka *et*  
415 *al.* 2021), some of which have shown very low relative frequencies of CG→AT transversions.  
416 Further, Duplex Sequencing, when used to measure mutations in human and mice mtDNAs,  
417 yielded spectra with very few CG→AT transversions (Kennedy *et al.* 2013 and Arbeithuber *et*  
418 *al.* 2020, respectively). Different high fidelity techniques have also revealed spectra relatively  
419 deplete of CG→AT transversions in the mtDNAs of wild-type fruit flies (Itsara *et al.* 2014) and  
420 mice (Ni *et al.* 2015).

421         Given that we detected mutations in pooled somatic and germline tissues, we considered  
422 the possibility that the relative abundance of CG→AT transversions in the Duplex Sequencing  
423 spectrum (Figure 1a) compared to what has been reported in nematode MA studies (Howe *et al.*  
424 2010; Molnar *et al.* 2011; Konrad *et al.* 2017) could reflect distinct mutational spectra in somatic  
425 vs. germline mtDNAs. Such a distinction would imply that oxidative damage and associated  
426 CG→AT transversions are more prevalent in somatic mtDNAs than in the mtDNAs maintained  
427 in the nematode germline. The mixed-stage populations from which we extracted DNA likely  
428 included some older individuals (no older than 14-16 days old, the total time of replicate growth;

429 Figure S1), potentially increasing the contribution of somatic mtDNA mutations (Kennedy *et al.*  
430 2013; Arbeithuber *et al.* 2020). However, studies of mtDNA replication across *C. elegans*  
431 development in mutant lines with deficiencies in Pol  $\gamma$  have established that mtDNA replication  
432 occurs primarily in the nematode gonad, such that essentially all somatic mtDNAs originate at  
433 embryogenesis (Bratic *et al.* 2009). The embryonic origin of somatic mtDNAs therefore blurs the  
434 distinction between somatic and germline mtDNAs in nematodes. If the abundance of CG $\rightarrow$ AT  
435 transversions is caused by oxidative damage to mtDNA in somatic tissues, it would indicate that  
436 there is some degree of active mtDNA replication or erroneous mtDNA repair converting single-  
437 stranded DNA damage into double-stranded mutations detectable with Duplex Sequencing.  
438 Given that our mitochondrial DCS coverage (13,257 $\times$  on average) is well below the estimated  
439 number of nematodes in each tissue pool (~50,000 assuming each of the 10 plates pooled for  
440 each replicate contained ~5,000 nematodes), we have likely sampled less than one mtDNA per  
441 nematode. Therefore, the 23 mutations that were detected in > 1 DCS in our dataset are more  
442 likely to be inherited, germline mtDNA mutations, present in multiple individuals within a  
443 replicate. Importantly, these sites yielded a spectrum with a similar frequency of CG $\rightarrow$ AT  
444 transversions (35% of all substitutions; Table S3) as in the full dataset (32% of all substitutions;  
445 Table S3; Figure 1a). Still, it is possible that the spectrum reported here is influenced in part by  
446 distinct mutational patterns in somatic mtDNAs.

447 Another potential explanation for the differences in the Duplex Sequencing results  
448 compared to those from MA studies is that our spectrum consists mostly of extremely rare  
449 variants captured by only a single DCS (230 of 253 observed SNVs), whereas nematode MA  
450 studies have applied detection cutoffs requiring variants to be present in at least 3 or 4 unique  
451 reads (for Illumina based studies with coverages of approximately 388 or 282; Konrad *et al.*

452 2017 and Wagner *et al.* 2020, respectively) or simply as ‘detectable on a chromatogram’ for  
453 Sanger based studies (Denver *et al.* 2000; Howe *et al.* 2010; Molnar *et al.* 2011). Given that the  
454 mutations detected in MA studies were initially generated as only a single copy within an  
455 individual and had to rise in frequency to meet detection thresholds, it seems likely that the MA  
456 mutation spectra could be biased by selection. Even small selective biases may have dramatic  
457 effects on observed spectra given that *C. elegans* MA studies passaged lineages for 214 or 363  
458 generations (roughly two or three years of propagation; Denver *et al.* 2000 and Konrad *et al.*  
459 2017, respectively), whereas our culturing design allowed just three generations for mutations to  
460 occur (Figure S1). By minimizing the number of generations, we may have reduced the  
461 opportunity for within-individual selection to shape the mutation spectrum, although this trades  
462 off with the fact that the absence of the bottlenecks used in MA lines would allow for selection  
463 to act at an organismal level in these three generations.

464         If CG→AT transversions experience stronger negative selection than CG→TA  
465 transitions, which is plausible since transversions are more likely to result in amino acid changes  
466 (Okimoto *et al.* 1992), they could be underrepresented in MA studies due to within-individual  
467 selection pressures. Indeed, in our Duplex Sequencing Data 93.4% (57/61) of CG→AT  
468 transversions but only 75.6% (61/82) of CG→TA transitions result in amino acid changes (File  
469 S1). This same logic has been used to explain an underrepresentation of nuclear CG→AT  
470 transversions in natural nematode populations compared to the relative abundance of nuclear  
471 CG→AT transversions in multiple nematode MA studies (Denver *et al.* 2012; Weller *et al.* 2014)  
472 because in that comparison, the natural population spectrum is expected to be more strongly  
473 affected by selection (Rajaei *et al.* 2021). Konrad *et al.* (2017) compared *C. elegans* mtDNAs  
474 from 38 natural isolates (sequenced in Thompson *et al.* 2013) and found that transitions

475 (including both CG→TA and TA→CG changes, which cannot be reliably polarized in the  
476 population dataset) account for 83% of the 408 observed substitutions, yielding a  
477 transition/transversion ratio (hereafter Ti/Tv ratio) of 4.75 (Table S4). The dominance of  
478 transitions at the population level appears to be driven in part by stronger selection against  
479 transversions because constraining the population data set to the 162 substitutions at four-fold  
480 degenerate sites yields a reduced Ti/Tv ratio of 3.26 (Table S4). The four-fold degenerate Ti/Tv  
481 ratio is still substantially higher than the Ti/Tv ratio we observe with Duplex Sequencing (1.32;  
482 Table S4). Considering that four-fold degenerate sites are expected to experience minimal  
483 selection, the elevated Ti/Tv ratio at four-fold sites compared to the one from our Duplex  
484 Sequencing data suggests the latter may not be fully representative of inherited mtDNA  
485 mutations in natural *C. elegans* populations.

486

#### 487 **Distribution of mtDNA SNVs across the mitochondrial genome.**

488 The large number of SNVs we detected with Duplex Sequencing allowed us to study how  
489 these events are distributed across the genome. As shown in the middle track (yellow histogram)  
490 of Figure 2a, the depth of DCS coverage varied substantially across the genome. Much of this  
491 variation can likely be attributed to differences in local GC content, as the AT DCS coverage  
492 (summed across replicates) accounted for only 72.1% of all DCS coverage, despite the fact that  
493 the mitochondrial genome is 75.6% AT. The AT vs. GC coverage disparity is exaggerated in  
494 regions with long stretches of sequence that are AT rich, as the 10% of 50 bp windows with the  
495 lowest GC content have 8.9-fold lower DCS coverage than windows of median GC content, and  
496 17.5-fold lower DCS coverage than the 10% windows with the highest GC content (Figure S2).  
497 Still, 95.6% of 50-bp windows had DCS coverage (summed across nine replicates) above 1000×

498 Bias against AT-rich sequences during library amplification and decreased binding affinities for  
499 AT rich baits during mtDNA enrichment both likely contribute to decreased AT coverage.

500 After correcting for differences in coverage, we found no variation in mutation frequency  
501 between intergenic regions, protein coding genes, rRNA genes or tRNA genes (one-way  
502 ANOVA,  $p = 0.99$ ; Figure 2b). However, comparisons against intergenic sequences are low  
503 powered given the relative lack of intergenic coverage (the largest of the two non-coding regions  
504 is extremely AT rich: 465 bp, 93.3% AT). A previous Duplex Sequencing study also found no  
505 variation across intergenic regions, protein coding genes, rRNA genes or tRNA genes in both  
506 wildtype fruit flies and in lines with a proofreading-deficient Pol  $\gamma$  (Samstag *et al.* 2018). We  
507 then tested for differences in mutation rates among protein coding genes, which comprise 74.5%  
508 of the *C. elegans* mtDNA. We found significant variation (one-way ANOVA,  $p = 0.0072$ ; Figure  
509 S3) driven by between-gene differences in CG $\rightarrow$ TA transition and CG $\rightarrow$ AT transversion  
510 frequencies (one-way ANOVAs,  $p = 0.016$  and  $6.3 \times 10^{-5}$  respectively; Figure 2c).

511 The cause of differences in SNV frequencies between genes remains unclear. Given the  
512 aforementioned mutational bias away from GC base pairs, we considered if differences in GC  
513 content among genes could be driving differences in SNV frequencies. There is a weak, positive  
514 correlation between gene-wide GC content and gene specific CG $\rightarrow$ TA transition frequencies  
515 (Pearson correlation:  $r=0.32$ ,  $p=0.304$ ; Figure S4) and a negative correlation between GC content  
516 and gene specific CG $\rightarrow$ TA transversion frequencies (Pearson correlation:  $r=-0.51$ ,  $p=0.086$ ;  
517 Figure S4), but neither was significant. Therefore, GC content variation does not explain  
518 differences in gene-specific mutation frequencies.

519 CG $\rightarrow$ TA transitions and CG $\rightarrow$ AT transversions both also show significant strand  
520 asymmetries (Figure 1b), so it seems possible that distance from an origin of replication (Kono *et*



521 *al.* 2018) or differential transcription (Gaillard and Aguilera 2016; Wang *et al.* 2016) could play  
522 a role in driving mutation rate differences among genes (Figure 2c). The intergenic region  
523 upstream of *ND6* (labelled ‘AT region’ and drawn in pink in Figure 2a) contains short repetitive  
524 elements which led several to propose this region may be analogous to the D-loop in mammalian  
525 mtDNAs, acting as the F-strand replication origin (Lemire 2005; Bratic *et al.* 2010). However,  
526 this region lacks a GC skew inflection point typical of replication origins (Kono *et al.* 2018) and  
527 fails to form bubble arcs indicative of replication origins in two-dimensional gel electrophoreses  
528 (Lewis *et al.* 2015). Given the lack of evidence surrounding the location of a replication origin in  
529 the *C. elegans* mtDNA, it is difficult to assess how distance from replication origins may be  
530 impacting among-gene mutation rate differences. It is unlikely that differences in expression  
531 drive among gene mutation rate differences, as the *C. elegans* mtDNA is likely transcribed as a  
532 polycistronic RNA (Blumberg *et al.* 2017), with differences in relative abundances of specific  
533 mRNA transcripts presumed to arise from differences in mRNA stability and decay (D’Souza  
534 and Minczuk 2018). Reverse-transcriptase droplet digital PCR (ddPCR) estimates reveal  
535 relatively small differences (~9-fold) in mRNAs levels among protein coding genes in the *C.*  
536 *elegans* mitochondria, while rRNAs are 50 to 200-fold more abundant than mRNAs (Held and  
537 Patel 2020). If transcription does drive mutation *C. elegans* mtDNAs, our finding of no  
538 difference in mutation rates between rRNA coding genes and protein coding genes (Figure 2b)  
539 supports the hypothesis that different levels of rRNA vs. mRNA arise through increased rRNA  
540 stability or mRNA decay (Held and Patel 2020). Yet another possibility, discussed below, is that  
541 differences in mutation frequencies among genes could be driven by local sequence features that  
542 are correlated with mutation and vary among genes.  
543

544 **Distribution of mtDNA SNVs based on local sequence variation.**

545 Previous analyses of mtDNA mutations in flies (Samstag *et al.* 2018) and mice (Ni *et al.* 2015)  
546 have shown that the identities of neighboring nucleotides can have large impacts on mtDNA  
547 mutation frequencies. To understand if local sequence contexts influence SNV frequencies in the  
548 *C. elegans* mtDNA, we compared the variant frequencies at the 16 trinucleotide contexts (i.e.,  
549 the mutated site and the flanking 5' and 3' nucleotides) for each substitution class and found  
550 significant effects for both CG→TA transitions and CG→AT transversions (one-way ANOVAs,  
551  $p = 0.040$  and  $3.6 \times 10^{-5}$ , respectively), but not in any of the other substitution classes (Figure 3).  
552 It is likely that CG→TA transitions and CG→AT transversions are the only substitution types to  
553 show significant trinucleotide variation because they make up the majority of detected SNVs,  
554 while tests for variation in the other substitution classes are comparatively low powered.  
555 Different trinucleotides are apparently important in the two significant substitution classes.  
556 CG→TA transitions are particularly common at GCC/GGC, GCG/CGC and CCC/GGG  
557 trinucleotides (written 5' to 3'). In contrast, CG→AT transversions are particularly common at  
558 ACT/AGT and ACG/CGT trinucleotides. It is possible that the above reported genic mutation  
559 rate variation among protein coding genes (Figure 2c) may be driven by a nonrandom  
560 distribution of 'mutagenic' trinucleotides.

561

562 **Nonsynonymous mutations are slightly more abundant than predicted by neutral**  
563 **simulations**

564 To assess whether the identified sample of mutations was biased by selection, we used a  
565 simulation-based approach to obtain a neutral expectation for the ratio of nonsynonymous to  
566 synonymous (NS:S) mutations. There were 205 observed SNVs in protein-coding sequences

567 (File S1), which we simulated onto a concatenation of the protein coding sequence. We  
568 attempted to control for the *C. elegans* mutation spectra and probability of detection by  
569 simulating the same number and type of each substitution from our observed data. This  
570 simulation was repeated 10,000 times to obtain a distribution of NS:S ratios. Our observed NS:S  
571 ratio of 3.01 was 1.3-fold higher than the median simulated value of 2.23 ( $p = 0.075$ ). This result  
572 suggests that neither synonymous nor nonsynonymous substitutions are significantly  
573 overrepresented in the observed Duplex Sequencing dataset (Figure 4). As such, there is no  
574 evidence that purifying selection has played a large role in filtering this pool of low-frequency  
575 variants. Why the observed ratio contained a (marginally) higher proportion of nonsynonymous  
576 substitutions than the simulated ratio is not clear, though a previous study of mtDNA mutations  
577 in *Drosophila melanogaster* reported a significant overabundance of nonsynonymous  
578 substitutions compared to neutral expectations in a similar simulation based test (Samstag *et al.*  
579 2018). Those authors proposed that deleterious mutations may reduce mitochondrial function,  
580 thus reducing the potential for oxidative damage and by extension make mutant bearing  
581 mitochondria “less prone to targeted degradation by quality control surveillance” (Samstag *et al.*  
582 2018).

583

584 **Indels are less common than SNVs and are predominantly expansions or contractions of**  
585 **existing homopolymers**

586 The aforementioned *C. elegans* MA experiments reached different conclusions regarding the  
587 relative abundance of indels vs. SNVs in mtDNAs, with the original study reporting a indel:SNV  
588 ratio of 0.65 (Denver *et al.* 2000) and the later study reporting a ratio of 1.42 (Konrad *et al.*  
589 2017). As noted above, we found that many identical indels were shared across replicates and

590 inferred that these shared variants arose from independent events, though we cannot rule out the  
591 possibility that they are ancestral, heteroplasmic variants. Assuming shared variants are  
592 independent events, we calculate an indel:SNV ratio of 0.75, supporting the finding that SNVs  
593 are more common than indels in the *C. elegans* mtDNA (Denver *et al.* 2000). This conclusion  
594 holds if we treat shared mutations as the products of a single event (shared ancestry), giving an  
595 indel:SNV ratio of 0.43. Duplex Sequencing coupled with hybridization-based enrichment is not  
596 designed to detect large deletions, which have been shown to accumulate at a high rate in  
597 mtDNAs of *C. briggsae* (Howe *et al.* 2010; Wagner *et al.* 2020), so we may be underestimating  
598 the total number of mtDNA indels. If indels are more prone to homoplasmy *within* replicates (than  
599 SNVs), which may well be the case at long homopolymers (single-nucleotide repeats), this  
600 would lead us to further underestimate the indel:SNV ratio.

601 We find different results for the relative abundance of insertions vs. deletions depending  
602 on how we categorize shared mutations. Deletions are about ~2-fold more abundant than  
603 insertions (65 vs. 36, respectively) when we assume that shared mutations arose through  
604 common ancestry. However, when assuming shared indels are independent events that arise  
605 through homoplasmy, we see a difference in the other direction (84 deletions vs. 108 insertions).  
606 This discrepancy reflects the fact that identical insertions were more commonly shared between  
607 replicates than were identical deletions. We surveyed the sequence surrounding each of the  
608 observed indels and found that the majority of both insertions and deletions are 1-bp expansions  
609 or contractions of existing homopolymers, which is consistent with previous *C. elegans* MA  
610 studies (Denver *et al.* 2000; Konrad *et al.* 2017). This pattern holds regardless of whether we  
611 assume shared indels arose through homoplasmy (Figure 5) or common ancestry (Figure S5).  
612 Accordingly, the length of both insertions and deletions skews heavily towards 1-bp mutations,

613 especially for insertions, as we did not observe a single insertion above 3 bp. We found 22  
614 deletions greater than 3 bp in length, with the largest being 15 bp in length. None of the deletions  
615 greater than 1 bp in length were associated with homopolymers.

616

## 617 **CONCLUSION**

618 Duplex Sequencing is a promising alternative approach to labor and time intensive MA  
619 experiments for understanding mechanisms of mutation in metazoan mtDNAs. The idea that  
620 these genomes experience increased mutational loads given the proximity of the mtDNA to  
621 electron transport and associated ROS (Harman 1972) predates initial observations that mtDNA  
622 mutation rates are elevated above nuclear mutation rates in metazoans (Brown *et al.* 1979).  
623 However, numerous experimental studies have not supported the hypothesis that oxidative  
624 damage drives rapid mtDNA evolution (Halsne *et al.* 2012; Kennedy *et al.* 2013; Itsara *et al.*  
625 2014). The large number of variants we detected with Duplex Sequencing provide a high-  
626 resolution view of the *C. elegans* mtDNA mutation spectrum (Fig 1a). These data support a role  
627 for oxidative damage because one of the predominant mutation classes, CG→AT transversions,  
628 is considered to be a hallmark of oxidative damage (Kennedy *et al.* 2013; Kino *et al.* 2017;  
629 Krašovec *et al.* 2017; Poetsch *et al.* 2018). In addition to CG→AT transversions, the spectrum  
630 also contains a high frequency of CG→TA transitions, and both classes show significant strand  
631 asymmetries (Fig 1b), with C→T and G→T changes enriched on the F-strand, providing further  
632 support that *C. elegans* mtDNA mutations are driven by single-stranded DNA damage. In  
633 contrast, if CG→TA transitions and CG→AT transversions were prevalent as a consequence of  
634 Pol  $\gamma$  misincorporations, it is not clear how this would lead to the strand asymmetries observed  
635 here. Further investigation is warranted to understand why CG→AT transversions are so

636 abundant in the mtDNA of *C. elegans*, but relatively deplete in other metazoan mtDNAs. A  
637 surprising finding from recent experiments in mice (Kauppila *et al.* 2018) and fruit flies is that  
638 CG→AT transversions remain rare even in animals with deficiencies in BER (the principal  
639 pathway for repair of damaged DNA). Considering the high rate of CG→AT transversions  
640 observed here, it would be interesting to repeat this study with *C. elegans* lines lacking BER  
641 capabilities.

642

### 643 **DATA AVAILABILITY**

644 The raw reads are available via the NCBI Sequence Read Archive (SRA) under accessions  
645 SRR14352240-14352248 (Duplex Sequencing libraries; Table S1) and SRR14352249,  
646 SRR14352237, and SRR14352238 (shotgun libraries 1, 2 and 3, respectively). The code used to  
647 process the raw reads, create consensus sequences and call variants is available here:  
648 <https://github.com/dbsloan/duplexseq>. The variants we detected through Duplex Sequencing are  
649 reported in File S1 (SNVs) and File S2 (indels).

650

### 651 **ACKNOWLEDGEMENTS**

652 We thank Tai Montgomery for supplying N2 nematodes, media and lab space. We also thank  
653 Anne Hess for help in implementing the mixed linear models used in this study. This work was  
654 supported by the National Institutes of Health (R01 GM118046) and a National Science  
655 Foundation graduate fellowship (DGE-1450032).

656

657

658 **REFERENCES:**

- 659 Allio R., S. Donega, N. Galtier, and B. Nabholz, 2017 Large variation in the ratio of  
660 mitochondrial to nuclear mutation rate across animals: Implications for genetic diversity  
661 and the use of mitochondrial DNA as a molecular marker. *Mol. Biol. Evol.* 34: 2762–2772.
- 662 Anderson A. P., X. Luo, W. Russell, and Y. W. Yin, 2020 Oxidative damage diminishes  
663 mitochondrial DNA polymerase replication fidelity. *Nucleic Acids Res.* 48: 817–829.
- 664 Arbeithuber B., J. Hester, M. A. Cremona, N. Stoler, A. Zaidi, *et al.*, 2020 Age-related  
665 accumulation of de novo mitochondrial mutations in mammalian oocytes and somatic  
666 tissues. *PLoS Biol.* 18: e3000745.
- 667 Bernt M., C. Bleidorn, A. Braband, J. Dambach, A. Donath, *et al.*, 2013 A comprehensive  
668 analysis of bilaterian mitochondrial genomes and phylogeny. *Mol. Phylogenet. Evol.* 69:  
669 352–364.
- 670 Blumberg A., E. J. Rice, A. Kundaje, C. G. Danko, and D. Mishmar, 2017 Initiation of mtDNA  
671 transcription is followed by pausing, and diverges across human cell types and during  
672 evolution. *Genome Res.* 27: 362–373.
- 673 Bratic I., J. Hench, J. Henriksson, A. Antebi, T. R. Bürglin, *et al.*, 2009 Mitochondrial DNA  
674 level, but not active replicase, is essential for *Caenorhabditis elegans* development. *Nucleic  
675 Acids Res.* 37: 1817–1828.
- 676 Bratic I., J. Hench, and A. Trifunovic, 2010 *Caenorhabditis elegans* as a model system for  
677 mtDNA replication defects. *Methods* 51: 437–443.
- 678 Brown W. M., M. George, and A. C. Wilson, 1979 Rapid evolution of animal mitochondrial  
679 DNA. *Proc. Natl. Acad. Sci.* 76: 1967–1971.
- 680 Broz A. K., G. Waneka, Z. Wu, M. F. Gyorffy, and D. B. Sloan, 2021 Detecting de novo

681 mitochondrial mutations in angiosperms with highly divergent evolutionary rates. *Genetics*  
682 In press.

683 Cheng K. C., D. S. Cahill, H. Kasai, S. Nishimura, and L. A. Loeb, 1992 8-Hydroxyguanine, an  
684 abundant form of oxidative DNA damage, causes G → T and A → C substitutions. *J. Biol.*  
685 *Chem.* 267: 166–172.

686 Cluett T. J., G. Akman, A. Reyes, L. Kazak, A. Mitchell, *et al.*, 2018 Transcript availability  
687 dictates the balance between strand-asynchronous and strand-coupled mitochondrial DNA  
688 replication. *Nucleic Acids Res.* 46: 10771–10781.

689 D’Souza A. R., and M. Minczuk, 2018 Mitochondrial transcription and translation: Overview.  
690 *Essays Biochem.* 62: 309–320.

691 DeBalsi K. L., K. E. Hoff, and W. C. Copeland, 2017 Role of the mitochondrial DNA replication  
692 machinery in mitochondrial DNA mutagenesis, aging and age-related diseases. *Ageing Res.*  
693 *Rev.* 33: 89–104.

694 Denver D. R., K. Morris, M. Lynch, L. L. Vassilieva, and W. K. Thomas, 2000 High direct  
695 estimate of the mutation rate in the mitochondrial genome of *Caenorhabditis elegans*.  
696 *Science* 289: 2342–2344.

697 Denver D. R., K. Morris, M. Lynch, and W. K. Thomas, 2004 High mutation rate and  
698 predominance of insertions in the *Caenorhabditis elegans* nuclear genome. *Nature* 430: 679–  
699 682.

700 Denver D. R., L. J. Wilhelm, D. K. Howe, K. Gafner, P. C. Dolan, *et al.*, 2012 Variation in base-  
701 substitution mutation in experimental and natural lineages of *caenorhabditis* nematodes.  
702 *Genome Biol. Evol.* 4: 513–522.

703 Falkenberg M., 2018 Mitochondrial DNA replication in mammalian cells: Overview of the



- 704 pathway. *Essays Biochem.* 62: 287–296.
- 705 Fan W., K. G. Waymire, N. Narula, P. Li, C. Rocher, *et al.*, 2008 A mouse model of  
706 mitochondrial disease reveals germline selection against severe mtDNA mutations. *Science*  
707 319: 958–962.
- 708 Frith M. C., 2011 Gentle masking of low-complexity sequences improves homology search.  
709 *PLoS One* 6: e28819.
- 710 Gaillard H., and A. Aguilera, 2016 Transcription as a Threat to Genome Integrity. *Annu. Rev.*  
711 *Biochem.* 85: 291–317.
- 712 Gemmell N. J., V. J. Metcalf, and F. W. Allendorf, 2004 Mother’s curse: The effect of mtDNA  
713 on individual fitness and population viability. *Trends Ecol. Evol.* 19: 238–244.
- 714 Gorelick A. N., M. Kim, W. K. Chatila, K. La, A. A. Hakimi, *et al.*, 2021 Respiratory complex  
715 and tissue lineage drive recurrent mutations in tumour mtDNA. *Nat. Metab.* 3: 558–570.
- 716 Gruber J., L. F. Ng, S. Fong, Y. T. Wong, S. A. Koh, *et al.*, 2011 Mitochondrial changes in  
717 ageing *caenorhabditis elegans* - what do we learn from superoxide dismutase knockouts?  
718 *PLoS One* 6: e19444.
- 719 Haag-Liautard C., N. Coffey, D. Houle, M. Lynch, B. Charlesworth, *et al.*, 2008 Direct  
720 estimation of the mitochondrial DNA mutation rate in *Drosophila melanogaster*. *PLoS Biol.*  
721 6: 1706–1714.
- 722 Halsne R., Y. Esbensen, W. Wang, K. Scheffler, R. Suganthan, *et al.*, 2012 Lack of the DNA  
723 glycosylases MYH and OGG1 in the cancer prone double mutant mouse does not increase  
724 mitochondrial DNA mutagenesis. *DNA Repair (Amst).* 11: 278–285.
- 725 Harman D., 1972 The Biologic Clock: The Mitochondria? *J. Am. Geriatr. Soc.* 20: 145–147.
- 726 Havird J. C., and D. B. Sloan, 2016 The roles of mutation, selection, and expression in

- 727 determining relative rates of evolution in mitochondrial versus nuclear genomes. *Mol. Biol.*  
728 *Evol.* 33: 3042–3053.
- 729 Hazkani-Covo E., R. M. Zeller, and W. Martin, 2010 Molecular poltergeists: Mitochondrial  
730 DNA copies (numts) in sequenced nuclear genomes. *PLoS Genet.* 6: e1000834.
- 731 He F., 2011 Common Worm Media and Buffers. *Bio-Protocol* 1: 5–7.
- 732 Held J. P., and M. R. Patel, 2020 Functional conservation of mitochondrial RNA levels despite  
733 divergent mtDNA organization. *BMC Res. Notes* 13: 334.
- 734 Hood W. R., A. S. Williams, and G. E. Hill, 2019 An Ecologist’s Guide to Mitochondrial DNA  
735 Mutations and Senescence. *Integr. Comp. Biol.* 59: 970–982.
- 736 Howe D. K., C. F. Baer, and D. R. Denver, 2010 High rate of large deletions in *Caenorhabditis*  
737 *briggsae* mitochondrial genome mutation processes. *Genome Biol. Evol.* 2: 29–38.
- 738 Itsara L. S., S. R. Kennedy, E. J. Fox, S. Yu, J. J. Hewitt, *et al.*, 2014 Oxidative Stress Is Not a  
739 Major Contributor to Somatic Mitochondrial DNA Mutations. *PLoS Genet.* 10: e1003974.
- 740 Jöers P., and H. T. Jacobs, 2013 Analysis of Replication Intermediates Indicates That *Drosophila*  
741 *melanogaster* Mitochondrial DNA Replicates by a Strand-Coupled Theta Mechanism. *PLoS*  
742 *One* 8: e53249.
- 743 Ju Y. S. eo., L. B. Alexandrov, M. Gerstung, I. Martincorena, S. Nik-Zainal, *et al.*, 2014 Origins  
744 and functional consequences of somatic mitochondrial DNA mutations in human cancer.  
745 *Elife* 3: e02935.
- 746 Katju V., and U. Bergthorsson, 2019 Old trade, new tricks: Insights into the spontaneous  
747 mutation process from the partnering of classical mutation accumulation experiments with  
748 high-throughput genomic approaches. *Genome Biol. Evol.* 11: 136–165.
- 749 Kauppila J. H. K., N. A. Bonekamp, A. Mourier, M. A. Isokallio, A. Just, *et al.*, 2018 Base-

750 excision repair deficiency alone or combined with increased oxidative stress does not  
751 increase mtDNA point mutations in mice. *Nucleic Acids Res.* 46: 6642–6649.

752 Keightley P. D., U. Trivedi, M. Thomson, F. Oliver, S. Kumar, *et al.*, 2009 Analysis of the  
753 genome sequences of three *Drosophila melanogaster* spontaneous mutation accumulation  
754 lines. *Genome Res.* 19: 1195–1201.

755 Kennedy S. R., J. J. Salk, M. W. Schmitt, and L. A. Loeb, 2013 Ultra-Sensitive Sequencing  
756 Reveals an Age-Related Increase in Somatic Mitochondrial Mutations That Are Inconsistent  
757 with Oxidative Damage. *PLoS Genet.* 9: e1003794.

758 Kennedy S. R., M. W. Schmitt, E. J. Fox, B. F. Kohn, J. J. Salk, *et al.*, 2014 Detecting ultralow-  
759 frequency mutations by Duplex Sequencing. *Nat. Protoc.* 9: 2586–2606.

760 Kino K., M. Hirao-Suzuki, M. Morikawa, A. Sakaga, and H. Miyazawa, 2017 Generation, repair  
761 and replication of guanine oxidation products. *Genes Environ.* 39: 21.

762 Kirkwood T. B. L., and A. Kowald, 2012 The free-radical theory of ageing - older, wiser and still  
763 alive: Modelling positional effects of the primary targets of ROS reveals new support.  
764 *BioEssays* 34: 692–700.

765 Kono N., M. Tomita, and K. Arakawa, 2018 Accelerated laboratory evolution reveals the  
766 influence of replication on the GC skew in *Escherichia coli*. *Genome Biol. Evol.* 10: 3110–  
767 3117.

768 Konrad A., O. Thompson, R. H. Waterston, D. G. Moerman, P. D. Keightley, *et al.*, 2017  
769 Mitochondrial mutation rate, spectrum and heteroplasmy in *Caenorhabditis elegans*  
770 spontaneous mutation accumulation lines of differing population size. *Mol. Biol. Evol.* 34:  
771 1319–1334.

772 Krašovec R., H. Richards, D. R. Gifford, C. Hatcher, K. J. Faulkner, *et al.*, 2017 Spontaneous

773 mutation rate is a plastic trait associated with population density across domains of life.  
774 PLoS Biol. 15: e2002731.

775 Kreutzer D. A., and J. M. Essigmann, 1998 Oxidized, deaminated cytosines are a source of C →  
776 T transitions in vivo. Proc. Natl. Acad. Sci. 95: 3578–3582.

777 Krzywinski M., J. Schein, I. Birol, J. Connors, R. Gascoyne, *et al.*, 2009 Circos: An information  
778 aesthetic for comparative genomics. Genome Res. 19: 1639–1645.

779 Langmead B., and S. L. Salzberg, 2012 Fast gapped-read alignment with Bowtie 2. Nat. Methods  
780 9: 357–359.

781 Lemire B., 2005 Mitochondrial genetics, pp. 1–10 in *WormBook : the online review of C. elegans*  
782 *biology*, The C. elegans Research Community.

783 Lewis S. C., P. Joers, S. Willcox, J. D. Griffith, H. T. Jacobs, *et al.*, 2015 A Rolling Circle  
784 Replication Mechanism Produces Multimeric Lariats of Mitochondrial DNA in  
785 *Caenorhabditis elegans*. PLoS Genet. 11: e1004985.

786 Ling F., R. Niu, H. Hatakeyama, Y. I. Goto, T. Shibata, *et al.*, 2016 Reactive oxygen species  
787 stimulate mitochondrial allele segregation toward homoplasmy in human cells. Mol. Biol.  
788 Cell 27: 1684–1693.

789 Ling F., and M. Yoshida, 2020 Rolling-circle replication in mitochondrial dna inheritance:  
790 scientific evidence and significance from yeast to human cells. Genes (Basel). 11: 514.

791 Liu H., and J. Zhang, 2020 Higher Germline Mutagenesis of Genes with Stronger Testis  
792 Expressions Refutes the Transcriptional Scanning Hypothesis. Mol. Biol. Evol. 37: 3225–  
793 3231.

794 Longley M. J., D. Nguyen, T. A. Kunkel, and W. C. Copeland, 2001 The Fidelity of Human  
795 DNA Polymerase  $\gamma$  with and without Exonucleolytic Proofreading and the p55 Accessory

- 796 Subunit. *J. Biol. Chem.* 276: 38555–38562.
- 797 Longley M. J., M. A. Graziewicz, R. J. Bienstock, and W. C. Copeland, 2005 Consequences of  
798 mutations in human DNA polymerase  $\gamma$ . *Gene* 354: 125–131.
- 799 Lynch M., M. S. Ackerman, J. F. Gout, H. Long, W. Sung, *et al.*, 2016 Genetic drift, selection  
800 and the evolution of the mutation rate. *Nat. Rev. Genet.* 17: 704–714.
- 801 Marni J. F., and N. Soondhiemer, 2010 Mitochondrial genetic diseases. *Curr. Opin. Pediatr.* 22:  
802 711–716.
- 803 Martin M., 2011 Cutadapt removes adapter sequences from high-throughput sequencing reads.  
804 *EMBnet.journal* 17: 10–12.
- 805 Melvin R. G., and J. W. O. Ballard, 2017 Cellular and population level processes influence the  
806 rate, accumulation and observed frequency of inherited and somatic mtDNA mutations.  
807 *Mutagenesis* 32: 323–334.
- 808 Miquel J., A. C. Economos, J. Fleming, and J. E. Johnson, 1980 Mitochondrial role in cell aging.  
809 *Exp. Gerontol.* 15: 575–591.
- 810 Molnar R. I., G. Bartelmes, I. Dinkelacker, H. Witte, and R. J. Sommer, 2011 Mutation rates and  
811 intraspecific divergence of the mitochondrial genome of *pristionchus pacificus*. *Mol. Biol.*  
812 *Evol.* 28: 2317–2326.
- 813 Monzio Compagnoni G., A. Di Fonzo, S. Corti, G. P. Comi, N. Bresolin, *et al.*, 2020 The Role of  
814 Mitochondria in Neurodegenerative Diseases: the Lesson from Alzheimer’s Disease and  
815 Parkinson’s Disease. *Mol. Neurobiol.* 57: 2959–2980.
- 816 Murphy M. P., 2009 How mitochondria produce reactive oxygen species. *Biochem. J.* 417: 1–13.
- 817 Nabel C. S., S. A. Manning, and R. M. Kohli, 2012 The curious chemical biology of cytosine:  
818 Deamination, methylation, and oxidation as modulators of genomic potential. *ACS Chem.*

819 Biol. 7: 20–30.

820 Ng L. F., L. T. Ng, M. Van Breugel, B. Halliwell, and J. Gruber, 2019 Mitochondrial DNA  
821 damage does not determine *C. Elegans* Lifespan. *Front. Genet.* 10: fgene.2019.00311.

822 Ni T., G. Wei, T. Shen, M. Han, Y. Lian, *et al.*, 2015 MitoRCA-seq reveals unbalanced cytosine  
823 to thymine transition in Polg mutant mice. *Sci. Rep.* 5: 12049.

824 Okimoto R., J. L. Macfarlane, D. O. Clary, and D. R. Wolstenholme, 1992 The mitochondrial  
825 genomes of two nematodes, *Caenorhabditis elegans* and *Ascaris suum*. *Genetics* 130: 471–  
826 498.

827 Poetsch A. R., S. J. Boulton, and N. M. Luscombe, 2018 Genomic landscape of oxidative DNA  
828 damage and repair reveals regioselective protection from mutagenesis 06 Biological  
829 Sciences 0604 *Genetics. Genome Biol.* 19: 215.

830 Rajaei M., A. S. Saxena, L. M. Johnson, M. C. Snyder, T. A. Crombie, *et al.*, 2021 Mutability of  
831 mononucleotide repeats, not oxidative stress, explains the discrepancy between laboratory-  
832 accumulated mutations and the natural allele-frequency spectrum in *C. elegans*. *bioRxiv*.

833 Richly E., and D. Leister, 2004 NUMTs in sequenced eukaryotic genomes. *Mol. Biol. Evol.* 21:  
834 1081–1084.

835 Richter C., J. W. Park, and B. N. Ames, 1988 Normal oxidative damage to mitochondrial and  
836 nuclear DNA is extensive. *Proc. Natl. Acad. Sci.* 85: 6465–6467.

837 Salk J. J., M. W. Schmitt, and L. A. Loeb, 2018 Enhancing the accuracy of next-generation  
838 sequencing for detecting rare and subclonal mutations. *Nat. Rev. Genet.* 19: 269–285.

839 Samstag C. L., J. G. Hoekstra, C. H. Huang, M. J. Chaisson, R. J. Youle, *et al.*, 2018 Deleterious  
840 mitochondrial DNA point mutations are overrepresented in *Drosophila* expressing a  
841 proofreading-defective DNA polymerase  $\gamma$ . *PLoS Genet.* 14: e1007805.

- 842 Schaack S., E. K. H. Ho, and F. MacRae, 2020 Disentangling the intertwined roles of mutation,  
843 selection and drift in the mitochondrial genome. *Philos. Trans. R. Soc. B Biol. Sci.* 375:  
844 20190173.
- 845 Schirmer M., R. D'Amore, U. Z. Ijaz, N. Hall, and C. Quince, 2016 Illumina error profiles:  
846 Resolving fine-scale variation in metagenomic sequencing data. *BMC Bioinformatics* 17:  
847 125.
- 848 Schmitt M. W., S. R. Kennedy, J. J. Salk, E. J. Fox, J. B. Hiatt, *et al.*, 2012 Detection of ultra-  
849 rare mutations by next-generation sequencing. *Proc. Natl. Acad. Sci.* 109: 14508–14513.
- 850 Shigenaga M. K., T. M. Hagen, and B. N. Ames, 1994 Oxidative damage and mitochondrial  
851 decay in aging. *Proc. Natl. Acad. Sci.* 91: 10771–10778.
- 852 Sloan D. B., A. K. Broz, J. Sharbrough, and Z. Wu, 2018 Detecting Rare Mutations and DNA  
853 Damage with Sequencing-Based Methods. *Trends Biotechnol.* 36: 729–740.
- 854 Szczepanowska K., and A. Trifunovic, 2015 Different faces of mitochondrial DNA mutators.  
855 *Biochim. Biophys. Acta - Bioenerg.* 1847: 1362–1372.
- 856 Thompson O., M. Edgley, P. Strasbourger, S. Flibotte, B. Ewing, *et al.*, 2013 The million  
857 mutation project: A new approach to genetics in *Caenorhabditis elegans*. *Genome Res.* 23:  
858 1749–1762.
- 859 Uchimura A., M. Higuchi, Y. Minakuchi, M. Ohno, A. Toyoda, *et al.*, 2015 Germline mutation  
860 rates and the long-term phenotypic effects of mutation accumulation in wild-type laboratory  
861 mice and mutator mice. *Genome Res.* 25: 1125–1134.
- 862 Wagner J. T., D. K. Howe, S. Estes, and D. R. Denver, 2020 Mitochondrial DNA variation and  
863 selfish propagation following experimental bottlenecks in two distantly related  
864 *Caenorhabditis briggsae* isolates. *Genes (Basel).* 11: 77.

- 865 <https://doi.org/10.3390/genes11010077>
- 866 Wai T., A. Ao, X. Zhang, D. Cyr, D. Dufort, *et al.*, 2010 The role of mitochondrial DNA copy  
867 number in mammalian fertility. *Biol. Reprod.* 83: 52–62.
- 868 Waneka G., Y. M. Vasquez, G. M. Bennett, and D. B. Sloan, 2021 Mutational Pressure Drives  
869 Differential Genome Conservation in Two Bacterial Endosymbionts of Sap-Feeding Insects.  
870 *Genome Biol. Evol.* 13: evaa254.
- 871 Wang C., J. R. McPherson, L. H. Zhang, S. Rozen, and K. Sabapathy, 2016 Transcription-  
872 associated mutation of *lasR* in *Pseudomonas aeruginosa*. *DNA Repair (Amst.)* 46: 9–19.
- 873 Weller A. M., C. Rödelberger, G. Eberhardt, R. I. Molnar, and R. J. Sommer, 2014 Opposing  
874 forces of A/T-biased mutations and G/C-biased gene conversions shape the genome of the  
875 nematode *Pristionchus pacificus*. *Genetics* 196: 1145–1152.
- 876 Wolfe K. H., W. H. Li, and P. M. Sharp, 1987 Rates of nucleotide substitution vary greatly  
877 among plant mitochondrial, chloroplast, and nuclear DNAs. *Proc. Natl. Acad. Sci.* 84:  
878 9054–9058.
- 879 Wu Z., G. Waneka, A. K. Broz, C. R. King, and D. B. Sloan, 2020 MSH1 is required for  
880 maintenance of the low mutation rates in plant mitochondrial and plastid genomes. *Proc.*  
881 *Natl. Acad. Sci.* 117: 16448–16455.
- 882 Xu S., S. Schaack, A. Seyfert, E. Choi, M. Lynch, *et al.*, 2012 High mutation rates in the  
883 mitochondrial genomes of *Daphnia pulex*. *Mol. Biol. Evol.* 29: 763–769.  
884 <https://doi.org/10.1093/molbev/msr243>
- 885 Yang S., X. Feng, Z. Jiao, D. Lu, M. Duan, *et al.*, 2016 The complete mitochondrial genome of  
886 *Caenorhabditis remanei* (Rhabditida: Rhabditoidae), in comparison with four other  
887 *Caenorhabditis* species. *Gene Reports* 5: 1–9.



- 888 Yasukawa T., A. Reyes, T. J. Cluett, M. Y. Yang, M. Bowmaker, *et al.*, 2006 Replication of  
889 vertebrate mitochondrial DNA entails transient ribonucleotide incorporation throughout the  
890 lagging strand. *EMBO J.* 25: 5358–5371.
- 891 Zheng W., K. Khrapko, H. A. Coller, W. G. Thilly, and W. C. Copeland, 2006 Origins of human  
892 mitochondrial point mutations as DNA polymerase  $\gamma$ -mediated errors. *Mutat. Res. -*  
893 *Fundam. Mol. Mech. Mutagen.* 599: 11–20.
- 894

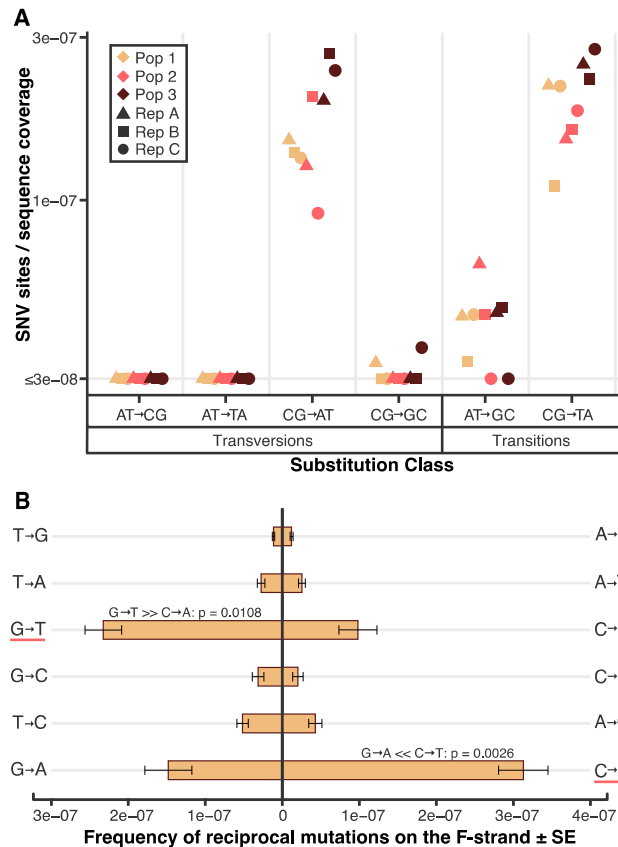

895

896 **Figure 1.** The *C. elegans* mtDNA mutation spectrum is dominated by mutations that increase AT

897 content and exhibits strand asymmetry. **(A)** Variation in the frequency of mutations across six

898 substitution classes. CG→AT transversions and CG→TA transitions are the most abundant

899 substitution types. Each point on the plot represents one of the nine replicates assayed. SNV

900 frequencies were calculated as the number of sites in a replicate with a mutation normalized by

901 the coverage of the corresponding base pair type. For example, the CG→AT mutation frequency

902 shows the CG→AT event count divided by GC coverage for each replicate. A floor was applied

903 to frequencies below  $3e-08$ , which approaches the error threshold of duplex sequencing (Wu *et*

904 *al.* 2020). **(B)** Strand asymmetry of mutations in *C. elegans* mtDNA. Both CG→AT and

905 CG→TA substitutions show significant strand asymmetry (one-way ANOVA, *p*-values noted on

906 figure), with the G→T and C→T changes (underlined in red) occurring predominately on the

907 forward (F) strand, which in *C. elegans* mtDNA is synonymous with the heavy-strand and for  
908 genic regions also the coding-strand. Mutation frequencies were calculated as the average of the  
909 nine replicates and were normalized by the sequencing coverage of each base type on the F-  
910 strand. For example, the G→T mutation frequency shows all G→T events on the F-strand  
911 divided by G coverage on the F-strand, and the C→A mutation frequency shows all C→A events  
912 on the F-strand divided by C coverage on the F-strand.

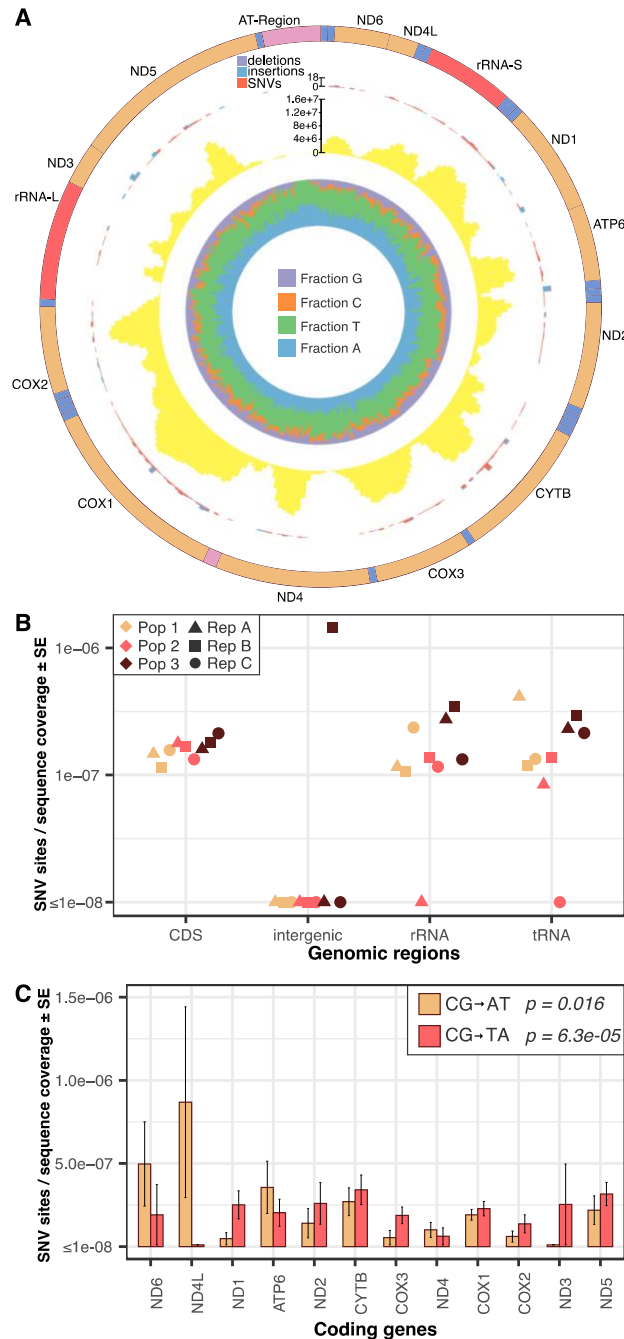

913

914 **Figure 2.** The distribution of mutations across the mitochondrial genome. (A) Map of the *C.*

915 *elegans* mtDNA and summary of Duplex Sequencing data. The outermost track depicts the gene

916 order and type, with protein-coding (CDS) genes shown in tan, rRNA genes shown in red, tRNA

917 genes shown in blue, and intergenic regions shown in pink. The next track in from the outside

918 depicts the total mutation counts in 50-bp windows, with deletions, insertions and SNVs colored

919 differently according to the key at the top of the track. The next track in from the outside (yellow  
920 histogram) depicts the cumulative (sum of nine replicates) DCS coverage in 50-bp windows,  
921 with a scale bar included at the top of the track. The innermost track shows the relative fraction  
922 of each base type in 50-bp windows, with colors specified by the key in the figure center. The  
923 figure was generated with Circos v0.69-8 (Krzyszowski *et al.* 2009). **(B)** Variation in SNV  
924 frequencies by genomic region. Note that low intergenic coverage resulted in the detection of  
925 only a single intergenic substitution (in replicate 3b). The other replicates had intergenic  
926 substitution counts of zero, but also had extremely low intergenic coverage, making comparisons  
927 that include intergenic SNV frequency low powered (see main text). No significant variation is  
928 observed among CDS, tRNA, or rRNA genes when the intergenic region is excluded. **(C)**  
929 Significant variation in SNV frequencies across the 12 protein coding genes was observed for  
930 only the two most common substitution classes (CG→AT transversions and CG→TA  
931 transitions). See Figure S3 for the gene specific mutation frequencies of all substitution classes.

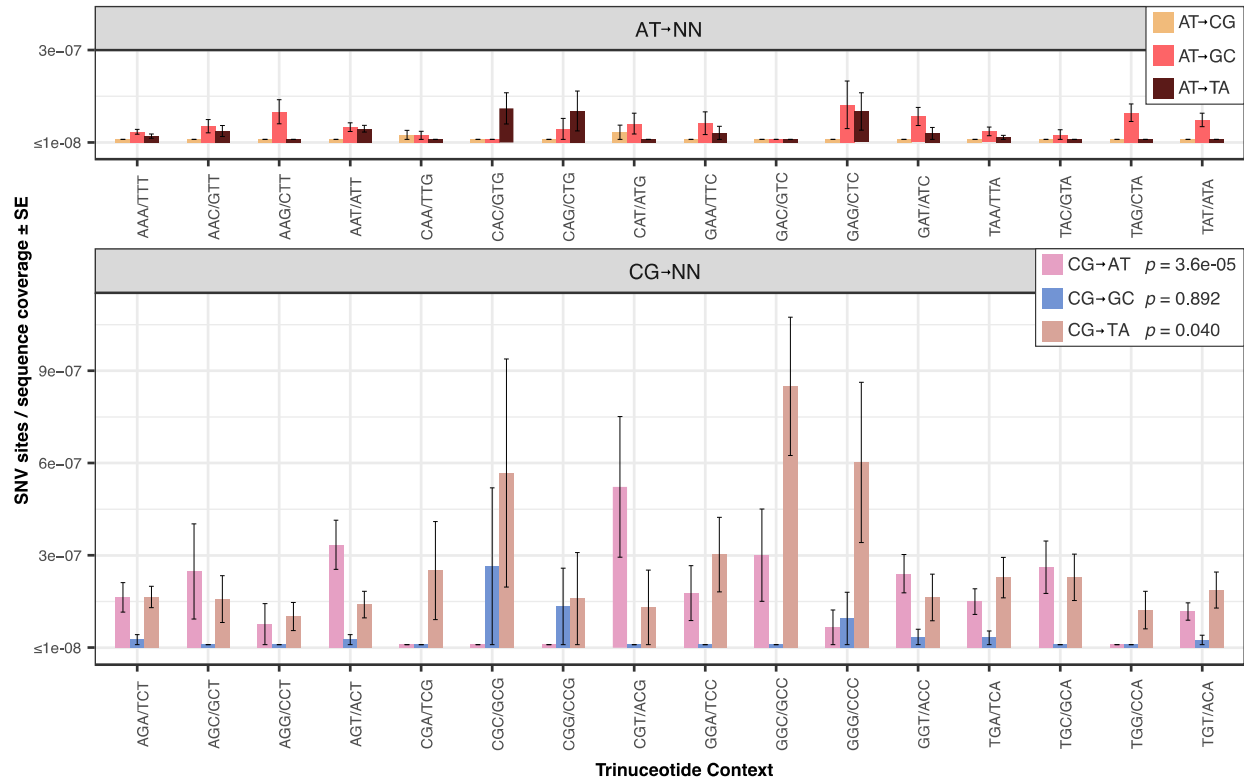

932

933 Figure 3. Variation in AT→NN (top panel) and CG→NN (bottom panel) mutation frequency

934 across different trinucleotide contexts, where NN refers to any other base-pair. Significant

935 variation was seen in the trinucleotide contexts for CG→AT transversions and CG→TA

936 transitions (one-way ANOVA, *p*-values in figure legend).

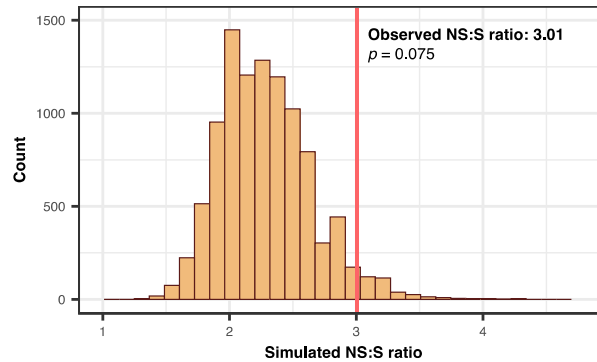

937

938 **Figure 4.** Simulation of mutations to derive null expectation of the ratio of nonsynonymous:

939 synonymous substitutions (NS:S). The observed ratio of NS:S (marked with the vertical red line)

940 is 1.3-fold higher than the null expectation generated from 10,000 simulations where the

941 observed number and type of coding sequence mutations were randomly mapped onto the coding

942 sequence, though this difference is not significant. The two-tailed  $p$ -value was derived by

943 dividing twice the number of simulated NS:S ratios with values greater than the observed NS:S

944 ratio by the total number of simulations ( $378*2/10000$ ).

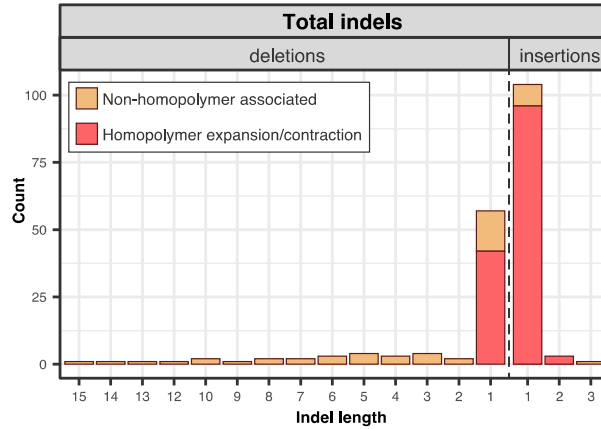

945

946 **Figure 5.** Indels are predominately found at homopolymers in *C. elegans* mtDNA. Here, indels  
947 that were shared between replicates were treated as independent events. See Figure S5 for counts  
948 that assume indels shared between replicates are the result of common ancestry. Indels that are  
949 expansions or contractions of existing homopolymers are shown in red, while those that are not  
950 associated with homopolymers are shown in tan.



951 **SUPPLEMENTARY MATERIAL**

952

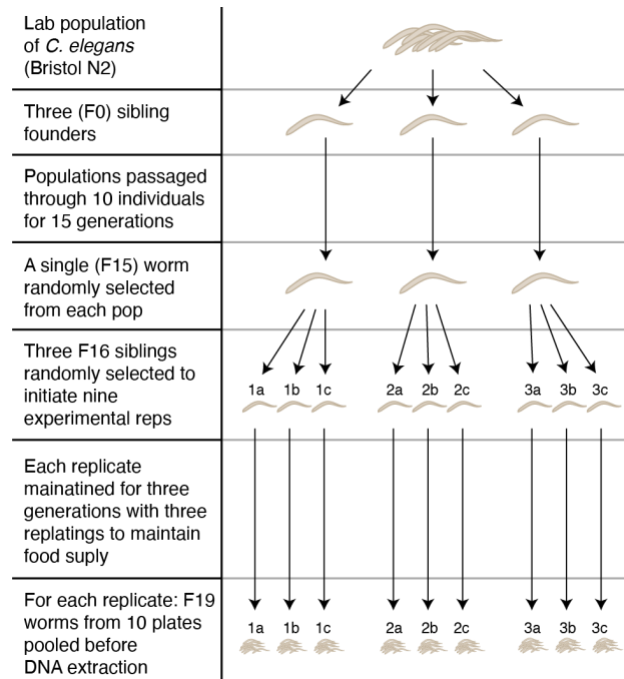

953

954 **Figure S1.** Culturing design used to obtain the nine replicates assayed in this study.

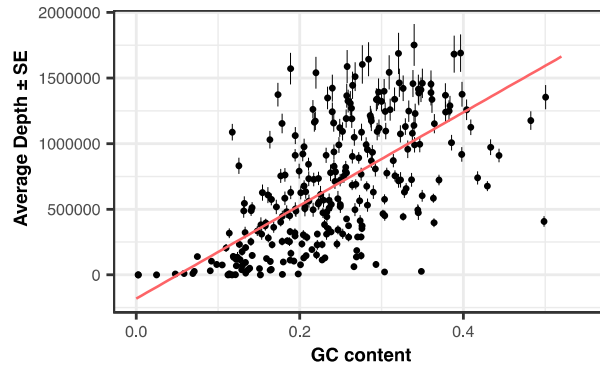

955

956 **Figure S2. Average DCS depth as a function of GC content.** Each point on the plot depicts a  
957 50-bp window, with DCS depths averaged across the nine replicates and error bars reporting one  
958 standard error. Points were jittered for clarity.

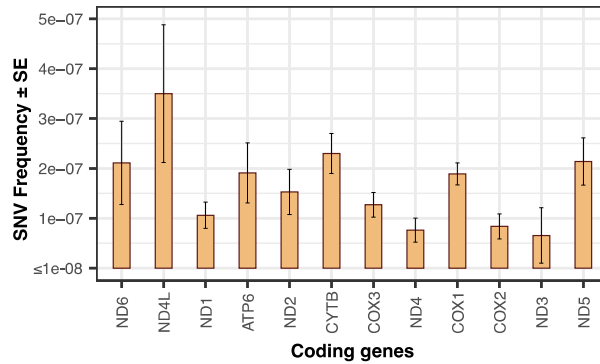

959

960 **Figure S3.** Variation in total SNV frequencies across the 12 protein-coding genes for all six  
961 substitution classes (one way ANOVA,  $p = 0.0072$ ). In separate tests with each substitution  
962 class, significant between gene variation was observed only for only CG→AT transversions and  
963 CG→TA transitions (see Figure 2c).

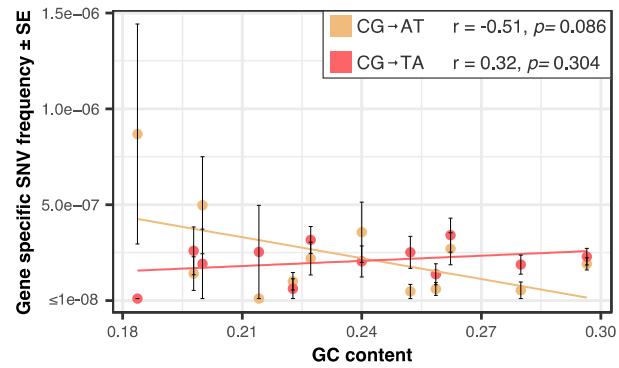

964

965 **Figure S4.** Correlation between gene specific SNV frequencies and GC content for CG→AT  
966 transversions and CG→TA transitions. R and *p* values (shown in legend) are from a Pearson  
967 correlation, implemented in R with the cor.test command.

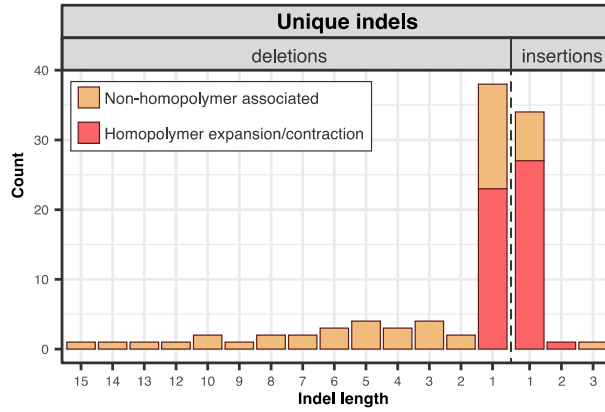

968

969 **Figure S5.** As in Figure 5, except that shared indels are assumed to be shared due to common

970 ancestry, so are only counted once regardless of the number of replicates in which they occur.

971 **Table S1. DCS coverage and percent mapping for each replicate.**

| Replicate | Total DCS bp | Percent reads Mapped | Coverage per mtDNA bp | SRA Accession numbers |
|-----------|--------------|----------------------|-----------------------|-----------------------|
| 1a        | 245145853    | 99.95                | 15451                 | SRR14352243           |
| 1b        | 143958801    | 99.97                | 9099                  | SRR14352244           |
| 1c        | 242990460    | 99.95                | 15351                 | SRR14352245           |
| 2a        | 168251787    | 99.86                | 10691                 | SRR14352246           |
| 2b        | 203908065    | 99.93                | 12980                 | SRR14352240           |
| 2c        | 230152257    | 99.89                | 14624                 | SRR14352241           |
| 3a        | 236482816    | 99.86                | 14911                 | SRR14352242           |
| 3b        | 198009375    | 99.91                | 12462                 | SRR14352247           |
| 3c        | 218583804    | 99.94                | 13749                 | SRR14352248           |
| Total     | 1887483218   | 99.91                | 119319                | NA                    |

972

973 **Table S2. Positions which differ between the published N2 mitochondrial genome**

974 **(NC\_001328.1) and our lab N2 line.** The two SNPs were completely fixed compared to

975 NC\_001328.1. In contrast, the 10 bp indel was supported by the majority of all DCSs, but it was

976 not completely fixed in any of the nine replicates.

| Type of difference | Position in NC_001328.1 | Reference base in NC_001328.1       | Reference base in our lab N2 line   |
|--------------------|-------------------------|-------------------------------------|-------------------------------------|
| SNP                | 8429                    | A                                   | G                                   |
| SNP                | 12998                   | C                                   | T                                   |
| indel              | 3235                    | A <sub>11</sub> (11 bp homopolymer) | A <sub>10</sub> (10 bp homopolymer) |

977

978 **Table S3. Proportions of the counts of each substitution class of the total counts for all**  
 979 **SNVs, singleton SNVs, and multi-DCS SNVs.** Note these proportions are not normalized for  
 980 biased base composition of the *C. elegans* mtDNA or for differential probability of detection for  
 981 AT and CG increasing variants due to uneven AT and CG coverage. For a normalized spectrum,  
 982 see Figure 1.

| Substitution Class | All SNVs | Singleton SNVs | Multi-DCS SNVs |
|--------------------|----------|----------------|----------------|
| AT→CG              | 0.01     | 0.01           | 0.00           |
| AT→GC              | 0.20     | 0.20           | 0.22           |
| AT→TA              | 0.08     | 0.07           | 0.13           |
| CG→AT              | 0.31     | 0.31           | 0.35           |
| CG→GC              | 0.03     | 0.03           | 0.00           |
| CG→TA              | 0.37     | 0.38           | 0.30           |
| Total Counts       | 253      | 230            | 23             |

983  
 984 **Table S4. Proportions of the counts of each substitution class of the total counts for all**  
 985 **SNVs as well as from the comparison of mtDNAs from 38 *C. elegans* natural isolates**  
 986 (Thompson *et al.* 2013; Konrad *et al.* 2017). Because substitutions in the population data cannot  
 987 be reliably polarized, all substitution classes have been collapsed into four reversible classes  
 988 (one transition and three transversions). As in Table S2, the proportions are not normalized to  
 989 reflect the base composition of the mtDNA.

| Substitution Class | All SNVs | Natural isolates all substitutions | Natural isolates substitutions at four-fold degenerate sites |
|--------------------|----------|------------------------------------|--------------------------------------------------------------|
| AT↔GC              | 0.57     | 0.83                               | 0.77                                                         |
| AT↔CG              | 0.32     | 0.07                               | 0.09                                                         |
| AT↔TA              | 0.08     | 0.10                               | 0.15                                                         |
| GC↔CG              | 0.03     | 0.002                              | 0.00                                                         |
| Total Counts       | 253      | 408                                | 162                                                          |

990
